# Supplementary material
Source: HighWire-hosted journal article supplement (https://ajnr-sso.highwirestaging.com/highwire/filestream/52323/field_highwire_adjunct_files/0/2980_materials.pdf)
Supplement: 2980_materials.pdf [file 2980_materials.pdf]

On-line Table: Patient Demographics

| Pt | Age | Gender | Presenting Symptoms                         | Cumulative Reader Diagnosis     | Reference Standard Diagnosis                         | F/U MRI |
|----|-----|--------|---------------------------------------------|---------------------------------|------------------------------------------------------|---------|
| 1  | 65  | M      | L face droop and hemiplegia                 | R MCA S                         | R MCA, WS & PCA S                                    | N       |
| 2  | 83  | F      | Slurred speech & drooling                   | L MCA S                         | L corona radiata MCA S                               | 4D      |
| 3  | 52  | F      | Homonymous hemianopsia & R side numb        | L PCA S                         | L OCCIP WM and VPL THAL S                            | N       |
| 4  | 65  | M      | Known L ICH from OSH                        | L MCA H                         | L F/P and BG H (PH2), IVH & SAH                      | N       |
| 5  | 78  | M      | 3–5 days worsening ataxia, slurred speech   | R MCA S                         | R ANT THAL S                                         | N       |
| 6  | 52  | M      | HA, L hemiparesis                           | R MCA H                         | R frontotemporal H (PH2, HTN VS other)               | 3 M     |
| 7  | 56  | F      | R side weak & face droop                    | L MCA S                         | L caudate, putamen, GP S                             | N       |
| 8  | 59  | M      | Homonymous hemianopsia & R UE/LE weak       | L PCA S                         | L PCA S                                              | N       |
| 9  | 52  | M      | Acute R ataxia, ASYM pupils                 | R VB S                          | LAT R medullary S (+R VERT DISSEC)                   | N       |
| 10 | 86  | F      | R facial droop                              | L MCA H                         | LRG L TEMP H (PH2) + IVH                             | N       |
| 11 | 87  | F      | HA                                          | R VB H + L MCA S                | Multifocal (pons, BG, MCA) H-emboli, L insula S. H1  | 7 M     |
| 12 | 58  | F      | HA, DESCEND AO DISSEC                       | B WS S                          | B/L WS embolic S                                     | N       |
| 13 | 82  | M      | New diplopia                                | L VB S                          | L dorsal medullary S                                 | N       |
| 14 | 52  | M      | New R side weakness and aphasia             | L MCA S                         | LRG L MCA and WS S (BG, TEMP, PARIET, insula)        | 1Y      |
| 15 | 74  | M      | Stutter, L face droop, slurred speech       | R MCA + WS S                    | R MCA and WS embolic S                               | 2D      |
| 16 | 62  | F      | Loss of consciousness                       | L MCA H                         | L BG H, PH2 + IVH                                    | 3 M     |
| 17 | 59  | F      | 3 W H/O aphasia                             | L MCA and WS S                  | Multifocal embolic L MCA and WS S                    | N       |
| 18 | 53  | F      | Acute L UE tingling, numb, dizzy            | No lesion                       | No lesion                                            | N       |
| 19 | 82  | F      | L face/UE weakness & A-FIB                  | R MCA S                         | R MCA WS S (COR RAD, insula, etc.)                   | N       |
| 20 | 59  | M      | R face droop, R UE deficit, aphasia         | L MCA HS                        | L putaminal H (PH2, likely HTN), L THAL S            | 7 M     |
| 21 | 56  | M      | Neck pain, prior R ICA dissection           | No lesion                       | No lesion                                            | 31 M    |
| 22 | 64  | F      | R side weakness                             | L PCA S                         | L posterior THAL S                                   | 3Y      |
| 23 | 75  | M      | Weakness                                    | B ACA + WS S                    | R genu & body CC, B F WS, R F PERIVENT S             | N       |
| 24 | 68  | M      | Blurry vision                               | L PCA + cerebellar S            | L PCA + cerebellar S                                 | N       |
| 25 | 84  | M      | Slurred speech                              | L MCA S                         | L corona radiata S                                   | N       |
| 26 | 91  | F      | Slurred speech, L face droop                | R MCA S                         | R corona radiata S                                   | N       |
| 27 | 70  | M      | R side numbness                             | L PCA S                         | Small L THAL S                                       | N       |
| 28 | 81  | F      | N, V, worsening HA                          | L cerebellar H                  | L cerebellar H (PH2)                                 | 4 M     |
| 29 | 79  | M      | HTN, S/P fall                               | L PCA S +/- H                   | L PCA S, + L THAL & M cerebral PED H (PH2)           | N       |
| 30 | 30  | F      | N, V, worsening HA, R side weakness         | L PCA H                         | L occipitoparietal H, PH2                            | N       |
| 31 | 65  | F      | Aphasia and R sided weakness                | L MCA S                         | L MCA + WS S                                         | N       |
| 32 | 59  | M      | Found down                                  | R MCA + WS HS                   | New R cerebral PED S, old LRG R centrum S            | N       |
| 33 | 79  | M      | R UE weakness                               | LRG L MCA S                     | Complete L MCA S                                     | N       |
| 34 | 55  | F      | L face droop + foot drop                    | R MCA S                         | R prefrontal gyrus S                                 | N       |
| 35 | 79  | F      | R UE & LE weakness                          | No lesion                       | No lesion                                            | 3Y      |
| 36 | 86  | M      | Fall, L leg weakness                        | No lesion                       | No lesion                                            | N       |
| 37 | 38  | M      | R UE/LE weakness, aphasia, & L ICA stenosis | No lesion                       | No lesion                                            | 8 M     |
| 38 | 70  | F      | S/P fall, comatose                          | B WS +/- MCA H                  | R WS and L FP H (PH2)                                | N       |
| 39 | 71  | M      | Lightheaded, N,V                            | R cerebellar + VB S             | R cerebellar and dorsal pontine S                    | 8 M     |
| 40 | 87  | M      | L UE & LE weakness x 1 W                    | R VB S                          | R ANT pontine S                                      | 3D      |
| 41 | 56  | M      | Transient L side weak/numb                  | R MCA S                         | R caudate body and POST putaminal S                  | N       |
| 42 | 34  | F      | HA, known HTN                               | B ACA, MCA, PCA + WS S          | L insula, THAL, BG, splenium CC, centrum, & R F WS S | N       |
| 43 | 35  | F      | Word finding difficulty, R hand clumsy      | L MCA and WS S                  | L MCA and WS (F + P) S                               | N       |
| 44 | 47  | M      | R BG bleed, tooth abscess                   | R MCA HS                        | R BG HS, PH1 (GBM on pathology)                      | 10 M    |
| 45 | 82  | F      | R side weak S/P AVR                         | L cerebellar, MCA, PCA, R PCA S | L cerebellar, MCA and PCA, R PCA embolic S           | N       |
| 46 | 63  | M      | R side dysmetria, HA S/P syncope            | SM R VB S                       | SM R DORSOLAT medullary S                            | N       |
| 47 | 58  | M      | R face UE + LE paresthesias, mild aphasia   | L PCA H                         | Small L THAL H (PH2)                                 | 3 M     |
| 48 | 75  | F      | Found down, unresponsive                    | Marked L IVH & HS               | L MCA & B/L ACA S + H (PH2) + IVH                    | N       |

R indicates right; L, left; B, bilateral; H, hemorrhage; S, ischemic stroke; HS, ischemic stroke with hemorrhagic transformation; IVH, intraventricular hemorrhage; WS, watershed territory; VB, vertebral; F, frontal; P, parietal; THAL, thalamus; GP, globus pallidus; GBM, glioblastoma multiforme; UE, upper extremity; LE, lower extremity; N, nausea; V, vomiting; HTN, hypertension; HA, headache; AO, aortic; DISSEC, dissection; AVR, aortic valve replacement; H1, petechial infarction without space-occupying effect; PH1, hematoma involving  $\leq 30\%$  of infarct area with some mild space-occupying effect; PH2, hematoma involving  $>30\%$  of infarcted area with significant mass effect or clot remote from the infarcted area [12]; F/U, follow-up; N, none; D, day; M, month(s); Y, year(s); Pt, patient; OSH, outside hospital; ASYM, asymmetry; DESCEND, descending; H/O, history of; A-FIB, atrial fibrillation; S/P, status post; BG, basal ganglia; PCA, posterior cerebral artery; LRG, large; ACA, anterior cerebral artery; SM, small; ANT, anterior; OCCIP, occipital; VPL, ventral posterolateral; LAT, lateral; VERT, vertebral; TEMP, temporal; DORSOLAT, dorsolateral; PERIVENT, periventricular; PARIET, parietal; COR RAD, corona radiata; PED, peduncle; CC, corpus callosum; POST, posterior.

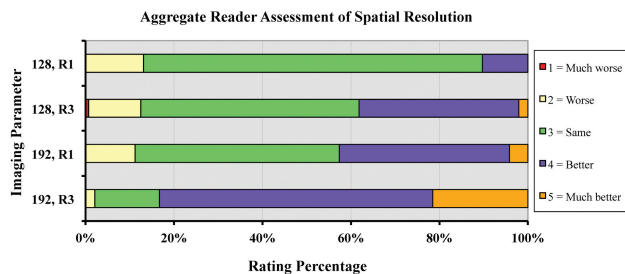

**On-line Figure 1.** Effect of matrix size and reduction factor upon reader assessment of spatial resolution. (128, R1 = matrix size of 128 x 128, and reduction factor of 1.) Nominal values 1–5 represent reader grading and assessment of spatial resolution compared with the standard DWI SS-EPI phase-encoding scheme at 1.5T, represented by percentage of total assigned values.

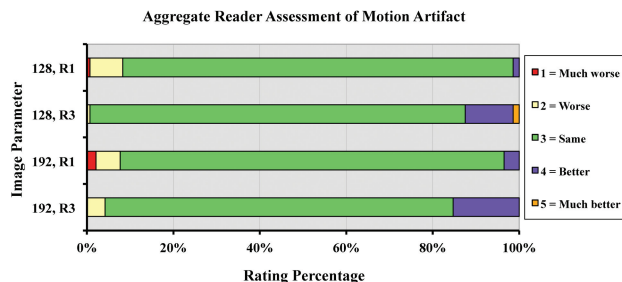

**On-line Figure 3.** Effect of matrix size and reduction factor upon reader assessment of motion artifact. (128, R1 = matrix size of 128 x 128, and reduction factor of 1.) Nominal values 1–5 represent reader grading and assessment of motion artifact compared with the standard DWI SS-EPI phase-encoding scheme at 1.5T, represented by percentage of total assigned values.

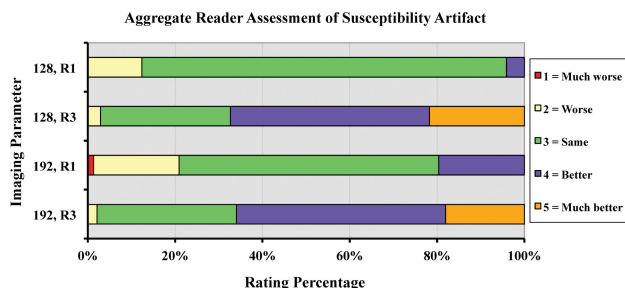

**On-line Figure 2.** Effect of matrix size and reduction factor upon reader assessment of overall susceptibility artifact. (128, R1 = matrix size of 128 x 128, and reduction factor of 1.) Nominal values 1–5 represent reader grading and assessment of susceptibility artifact compared with the standard DWI SS-EPI phase-encoding scheme at 1.5T, represented by percentage of total assigned values.

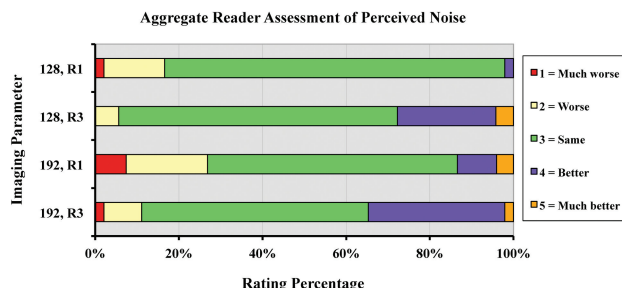

**On-line Figure 4.** Effect of matrix size and reduction factor upon reader assessment of image noise. (128, R1 = matrix size of 128 x 128, and reduction factor of 1.) Nominal values 1–5 represent reader grading and assessment of perceived noise compared with the standard DWI SS-EPI phase-encoding scheme at 1.5T, represented by percentage of total assigned values.
